# Supplementary material
Source: MDPI journal article supplement (https://www.mdpi.com/2077-0472/11/12/1289)
Supplement: s1 [file s1]

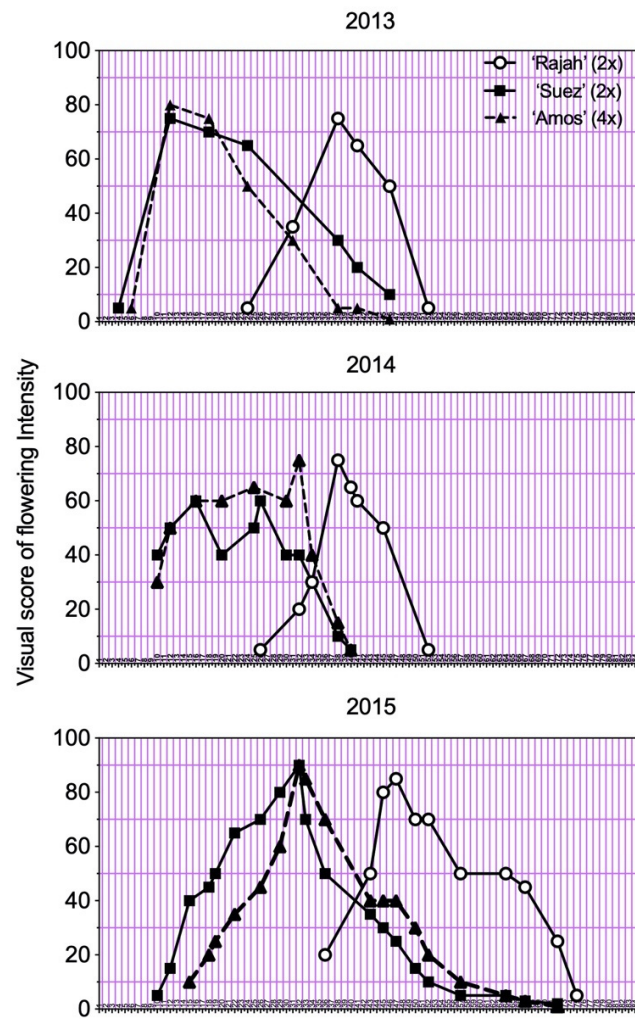

**Figure S1.** Grid used for determining the peak flowering time. Numbers from 1 to 85 on x-axis represent days from 1 June to 24 August.
